# Supplementary material
Source: bioRxiv or medRxiv preprint supplement (https://www.biorxiv.org/highwire/filestream/127058/field_highwire_adjunct_files/0/330639-1.pdf)
Supplement: Supplementary file [file 330639-1.pdf]

# Automated High-Throughput Light-Sheet Fluorescence Microscopy of Larval Zebrafish

Savannah L. Logan, Christopher Dudley, Ryan P. Baker, Michael J. Taormina, Edouard A. Hay, Raghuveer Parthasarathy

## Supplemental Figures

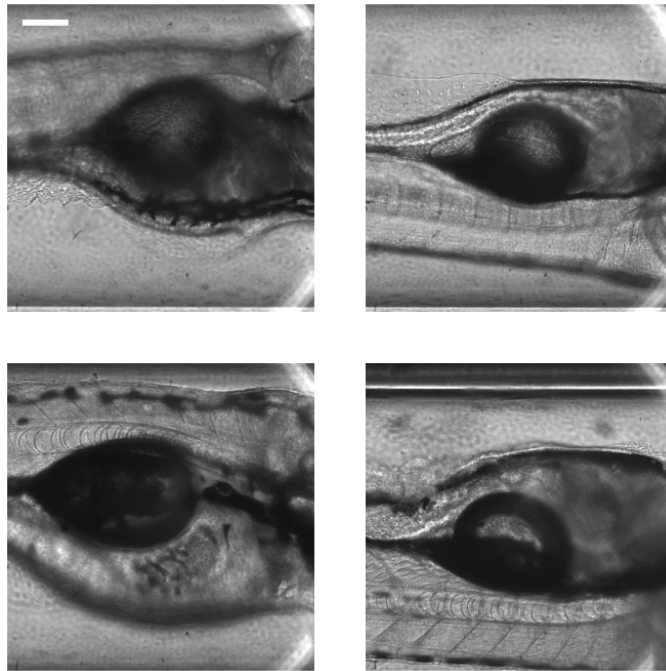

**Supplemental Figure 1.** Sample brightfield images of four larval zebrafish, captured and saved prior to light sheet fluorescence imaging. Notably, the orientation is random in the capillary, with a tendency toward either “gut down” or “gut up.” Scale bar: 100  $\mu\text{m}$ .

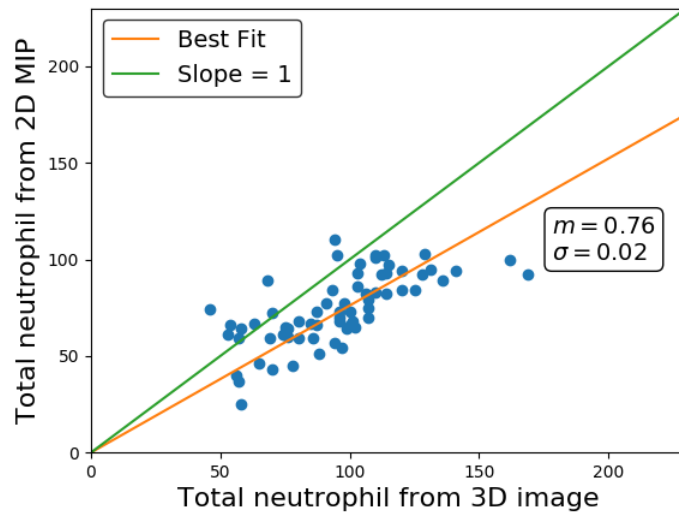

**Supplemental Figure 2.** The number of neutrophils in 67 larval zebrafish, assessed from two-dimensional maximum intensity projections and from the full three-dimensional light sheet fluorescence scans. The former is  $0.76 \pm 0.02$  of the latter, indicating that three-dimensional imaging is necessary to capture all the cells in a three-dimensional volume.
